# Supplementary material
Source: Springer Nature journal article supplement (https://www.springermedizin.de/resource/supplementary/13075_2012_3997_MOESM8_ESM.pdf/9695740)
Supplement: MOESM8 [file 9695740]

|                                                              | Alcian blue                                                                                | Collagen II                                                                                 | Collagen I                                                                                   |
|--------------------------------------------------------------|--------------------------------------------------------------------------------------------|---------------------------------------------------------------------------------------------|----------------------------------------------------------------------------------------------|
| Cells isolated from<br>BNC<br>(after 8 weeks)                | (A1)<br>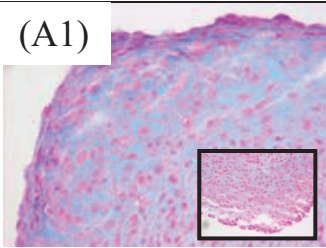   | (B1)<br>   | (C1)<br>   |
| Cells isolated from<br>cartilage surface<br>(after 8 weeks)  | (A2)<br>  | (B2)<br>  | (C2)<br>  |
| Cells isolated from<br>digested cartilage<br>(after 8 weeks) | (A3)<br> | (B3)<br> | (C3)<br> |
